# Supplementary material for: GSTO1 confers drug resistance in HCT-116 colon cancer cells through an interaction with TNFαIP3/A20
Source: PubMed Central journal article supplement — Int J Oncol. 2022 Sep 21;61(5):136. doi: 10.3892/ijo.2022.5426 (PMC9521632; doi:10.3892/ijo.2022.5426), 2022-09-21

Figure S1. The receiver operating characteristic curve for disease-specific survival indicated a cut-off score of CLDN9-SI  $\geq 2$ . SI, signal intensity.

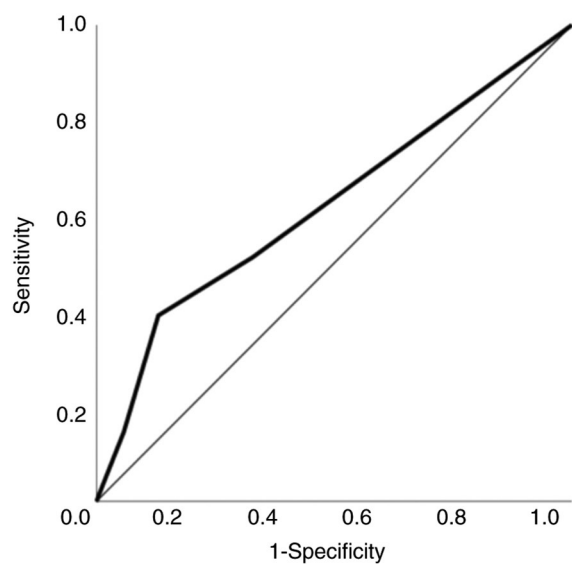

| IS cut off | Sensitivity | 1-Specificity |
|------------|-------------|---------------|
| <0.5       | 0.512       | 0.329         |
| <1.5       | 0.390       | 0.130         |
| <2.5       | 0.146       | 0.058         |

Figure S2. Immunohistochemical staining for claudin 9 in normal human tissues (scale bar, 100  $\mu$ m).

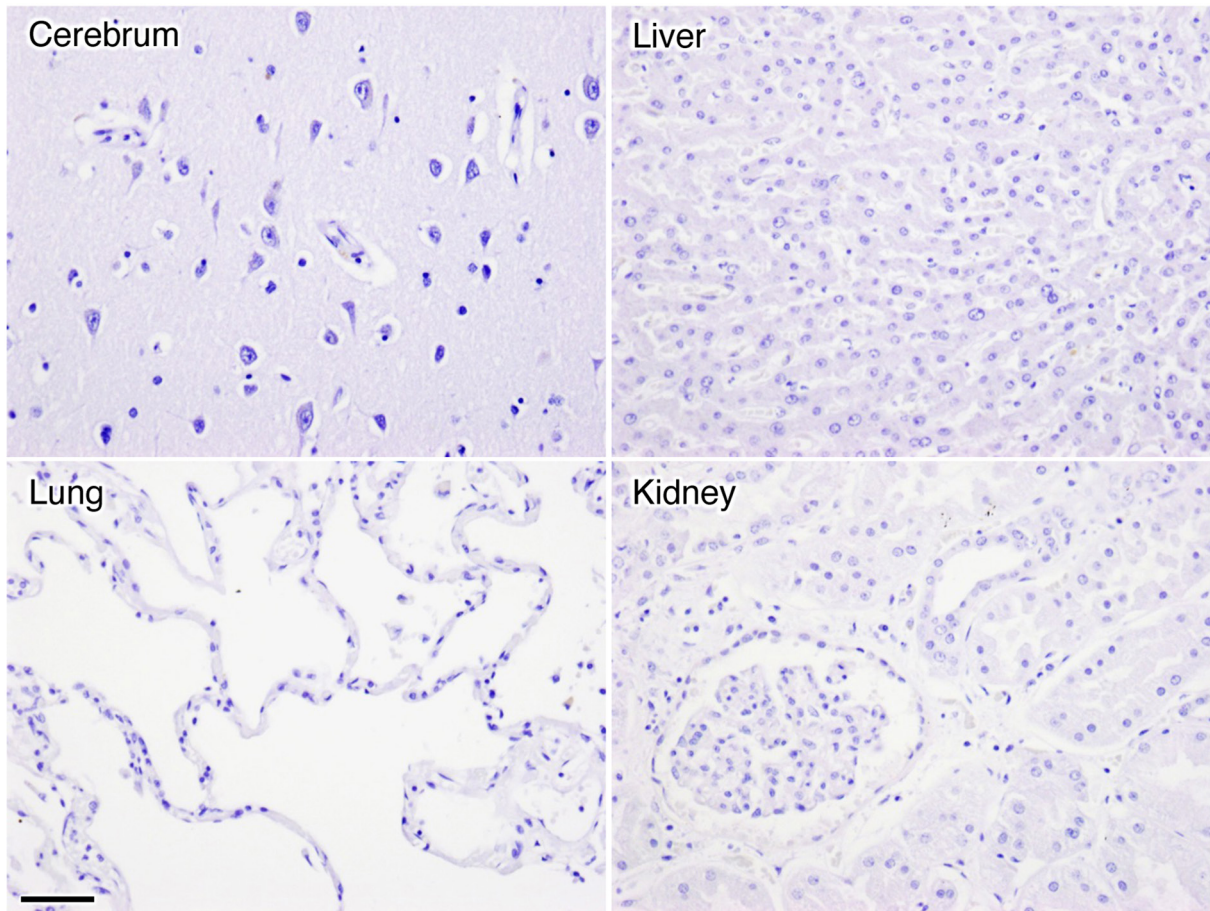

Figure S3. Distribution of percentages of CLDN9-positive cells with the corresponding IRS PP scores. CLDN, claudin; IRS, immunoreactive score; PP, percentage of positive cells.

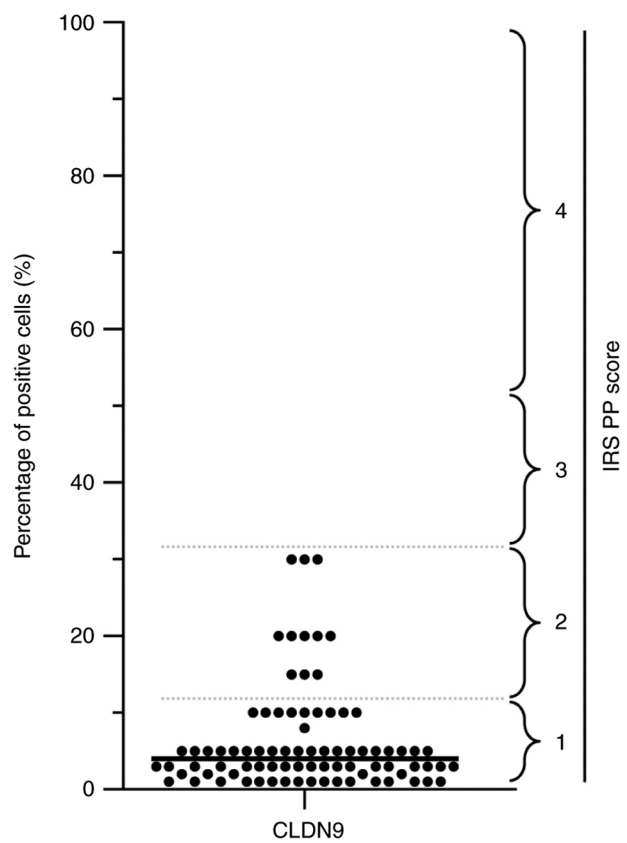

Supplement: Supplementary_Data1.pdf [file Supplementary_Data1.pdf]
