# Supplementary material for: GSTO1 confers drug resistance in HCT-116 colon cancer cells through an interaction with TNFαIP3/A20
Source: PubMed Central journal article supplement — Int J Oncol. 2022 Sep 21;61(5):136. doi: 10.3892/ijo.2022.5426 (PMC9521632; doi:10.3892/ijo.2022.5426), 2022-09-21
Supplement: Supplementary_Data2.pdf [file Supplementary_Data2.pdf]

Table SI. Association between CLDN9 expression and p53 mutation in Type II endometrial cancer.

| p53       | CLDN9         |                | P-value |
|-----------|---------------|----------------|---------|
|           | Low<br>(n=41) | High<br>(n=13) |         |
| Wild-type | 24 (44.4)     | 8 (14.8)       | 0.848   |
| Mutant    | 17 (31.5)     | 5 (9.3)        |         |

Values are expressed as n (%). CLDN, claudin.

Table SII. Association between CLDN6 expression and p53 mutation in Type II endometrial cancer.

| p53       | CLDN6         |                | P-value |
|-----------|---------------|----------------|---------|
|           | Low<br>(n=43) | High<br>(n=11) |         |
| Wild-type | 30 (55.6)     | 2 (3.7)        | 0.003   |
| Mutant    | 13 (24.1)     | 9 (16.7)       |         |

Values are expressed as n (%). CLDN, claudin.
